# Supplementary material for: Distinct B-Cell Specific Transcriptional Contexts of the BCL2 Oncogene Impact Pre-Malignant Development in Mouse Models
Source: MDPI journal article supplement (doi:10.3390/cancers14215337), 2022-10-29

## Supplemental information

**Table S1:** Table summarizing the list of antibodies used for the staining Panel of B and T cells in the Bone Marrow and peripheral lymphoid organs (Spleen / mesenteric Lymph nodes). Antibodies used for intracellular staining of permeabilized cells are highlighted in grey.

**Figure S1:** (A). Gating strategy for staining of B cells in the bone marrow and periphery respectively. (B). Gating strategy for staining of B-lineage cells in the spleen or lymph nodes **(C)** Gating strategy for the staining of T cells in the periphery (staining examples are from a resting unimmunized WT mouse).

**Figure S2:** Heatmap showing expression of the Top 10 differentially expressed genes defining the various B-cell clusters identified by single-cell transcriptome analysis.

**Next-generation sequencing data are deposited on G.E.O. under the following accession numbers:**

- **GSE217605** for bulk RNAseq
- **GSE214095** for scRNAseq

Table S1: Staining Panel

| LB Moelle (BM)        |           |                |          | Peripheral B cells<br>(Spleen + mesenteric Lymph nodes) |            |                |          | T cells<br>(Spleen + mesenteric Lymph nodes) |           |                 |          |
|-----------------------|-----------|----------------|----------|---------------------------------------------------------|------------|----------------|----------|----------------------------------------------|-----------|-----------------|----------|
| Antibody              | Reference | Supplier       | Dilution | Antibody                                                | Reference  | Supplier       | Dilution | Antibody                                     | Reference | Supplier        | Dilution |
| Bcl2 BV421            | Bcl-2/100 | BD Biosciences | 1/50     | Bcl2 BV421                                              | Bcl-2/100  | BD Biosciences | 1/50     | Ki-67 BV786                                  | B56       | BD Biosciences  | 1/50     |
| CD19 BV510            | 1D3       | BD Biosciences | 1/200    | CD19 BV510                                              | 1D3        | BD Biosciences | 1/200    | Bcl6 FITC                                    | K112-91   | BD Biosciences  | 1/50     |
| CD24 BV650            | M1/69     | BD Biosciences | 1/400    | CD93 BV650                                              | AA4.1      | BD Biosciences | 1/200    | fox P3 PE                                    | FJK-16s   | Invitrogen      | 1/100    |
| CD23 BV711            | B3B4      | BD Biosciences | 1/100    | CD138 Biotin                                            | 281-2      | Biolegend      | 1/200    | CD62L BV421                                  | MEL-14    | BD Biosciences  | 1/1000   |
| B220Bv786             | RA3-6B2   | BD Biosciences | 1/100    | CD23 FITC/ A488                                         | B3B4       | Biolegend      | 1/100    | CD4 PE-CF594                                 | RM4-5     | BD Biosciences  | 1/400    |
| CD2 FITC/A488         | RM2-5     | BD Biosciences | 1/800    | IgD PerCP-Cy5.5                                         | 11-26c.2a  | BD Biosciences | 1/100    | Icos PerCP-Cy5.5                             | C398.4A   | Biolegend       | 1/100    |
| CD117 PerCP-Cy5.5     | 2B8       | Biolegend      | 1/50     | CXCR4 PE                                                | 551966     | BD Biosciences | 1/50     | PD1 PE-Cy7                                   | 29F.1A12  | Biolegend       | 1/50     |
| CD43 PE               | S7        | BD Biosciences | 1/50     | CD21 PE-CF594                                           | 7G6        | BD Biosciences | 1/400    | CXCR5 APC                                    | REA215    | Milteny Biotech | 1/50     |
| BP1 Biotin            | 6C3       | BD Biosciences | 1/25     | IgM PC7                                                 | eB121-15F9 | Invitrogen     | 1/200    | CD44 APC-cy7                                 | IM7       | BD Biosciences  | 1/100    |
| IgM PE-Cy5            | II/41     | eBiosciences   | 1/100    | GL7 APC                                                 | GL7        | Invitrogen     | 1/100    | FVS 510                                      | 564406    | BD Biosciences  | 1/1000   |
| CD25 PE-Cy7           | PC61      | Biolegend      | 1/50     | CD38 APC-R700                                           | 90         | Invitrogen     | 1/100    |                                              |           |                 |          |
| CD127 APC             | 564175    | BD Biosciences | 1/50     | Streptavidin BV786                                      | 563858     | BD Biosciences | 1/400    |                                              |           |                 |          |
| CD138 APC-R700        | 281-2     | BD Biosciences | 1/200    | FVS 780 APC-H7                                          | 565388     | BD Biosciences | 1/1000   |                                              |           |                 |          |
| Streptavidin PE-CF594 | 562318    | BD Biosciences | 1/400    |                                                         |            |                |          |                                              |           |                 |          |
| FVS 780 APC-H7        | 565388    | BD Biosciences | 1/1000   |                                                         |            |                |          |                                              |           |                 |          |

Antibodies used for intracellular staining of permeabilized cells are highlighted in Grey

Figure S1A : Gating strategy for B cells in the Bone marrow

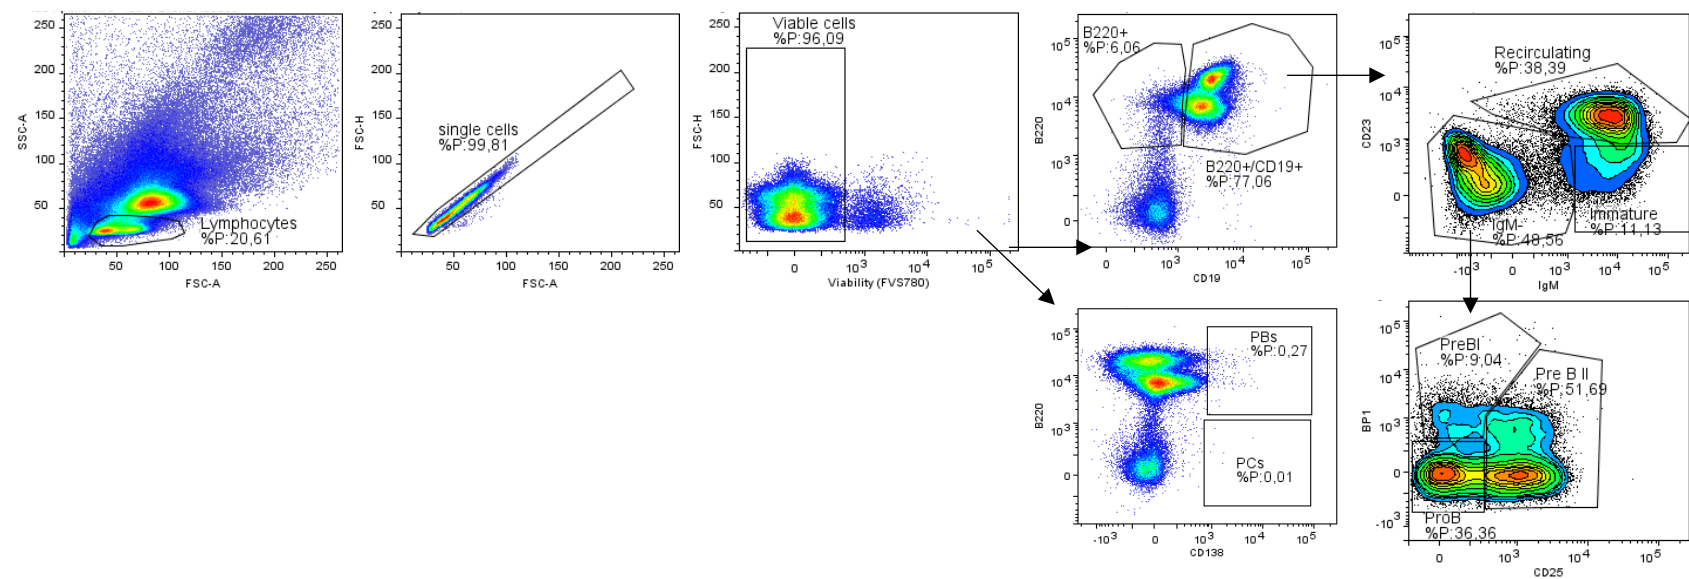

Figure S1B: Gating strategy for peripheral B cells (spleen and mesenteric LNs)

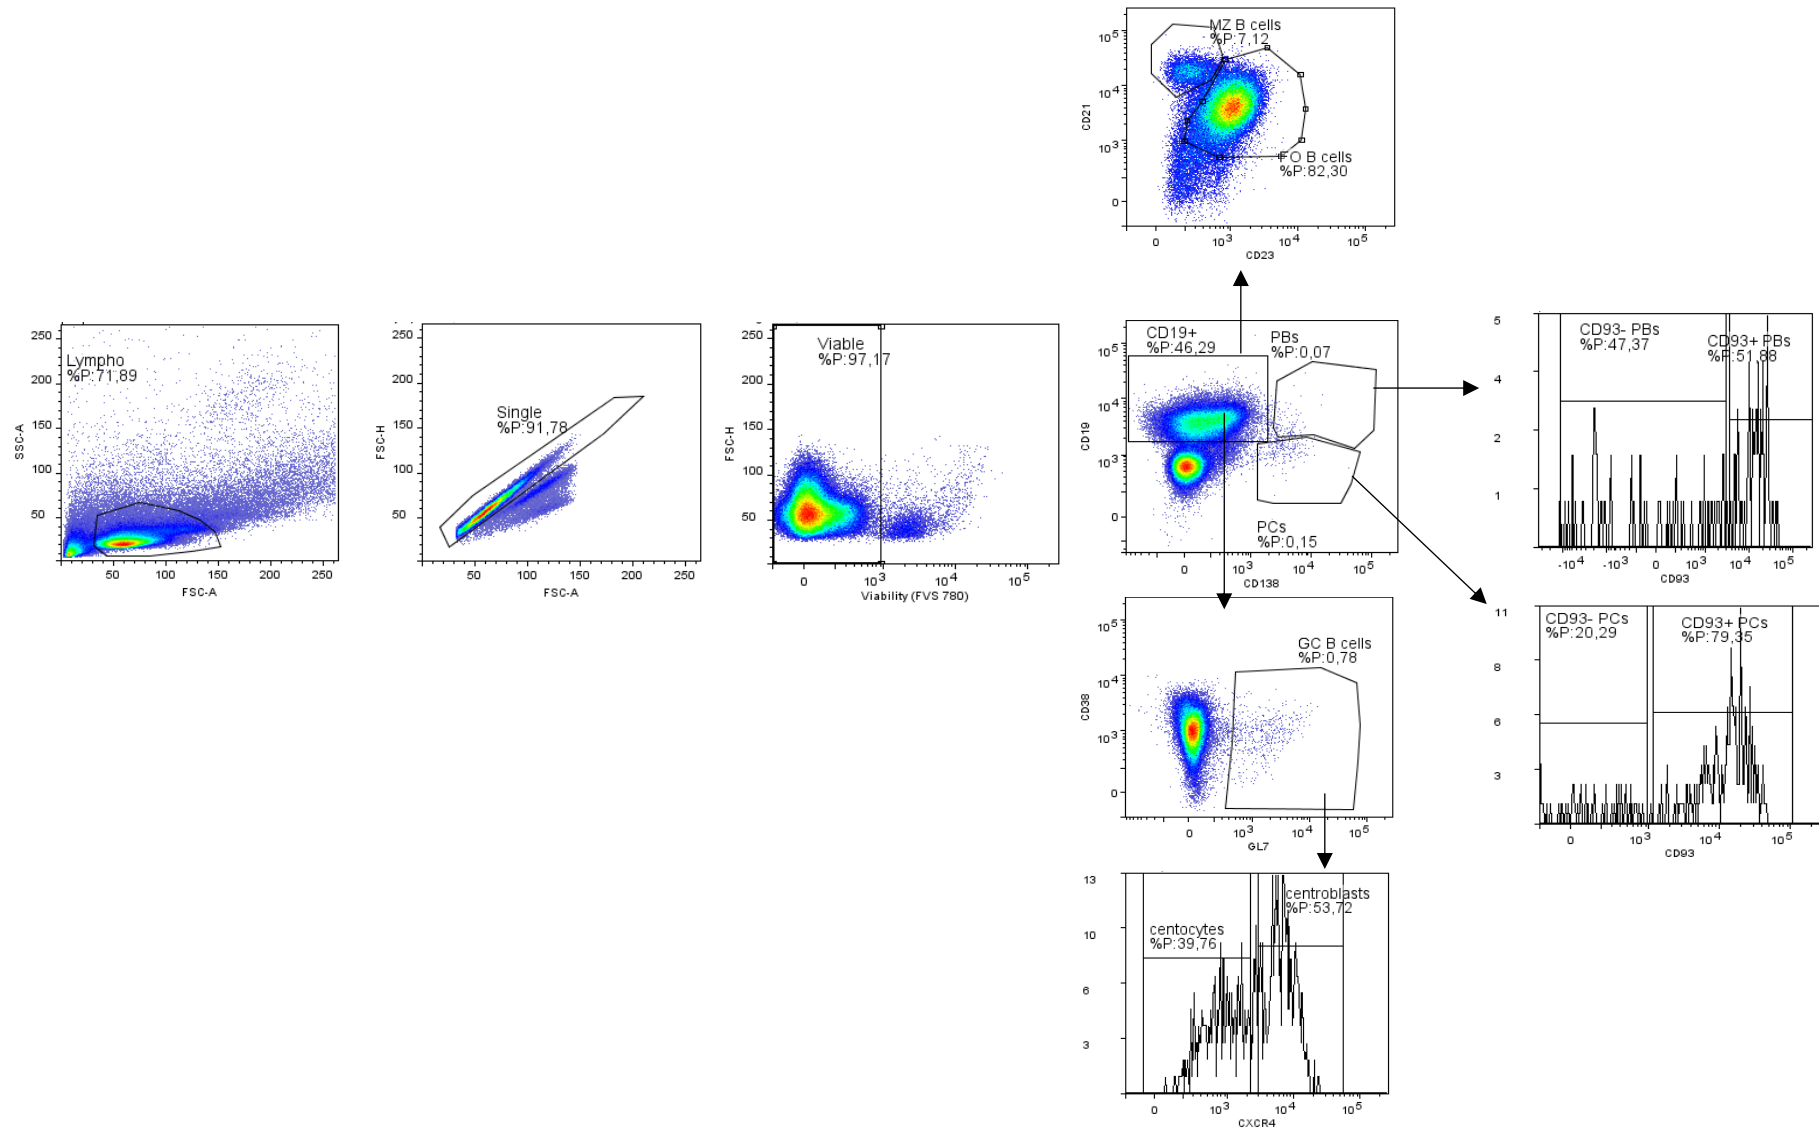

Figure S1C: Gating strategy for peripheral T cells (in spleen and mesenteric LNs)

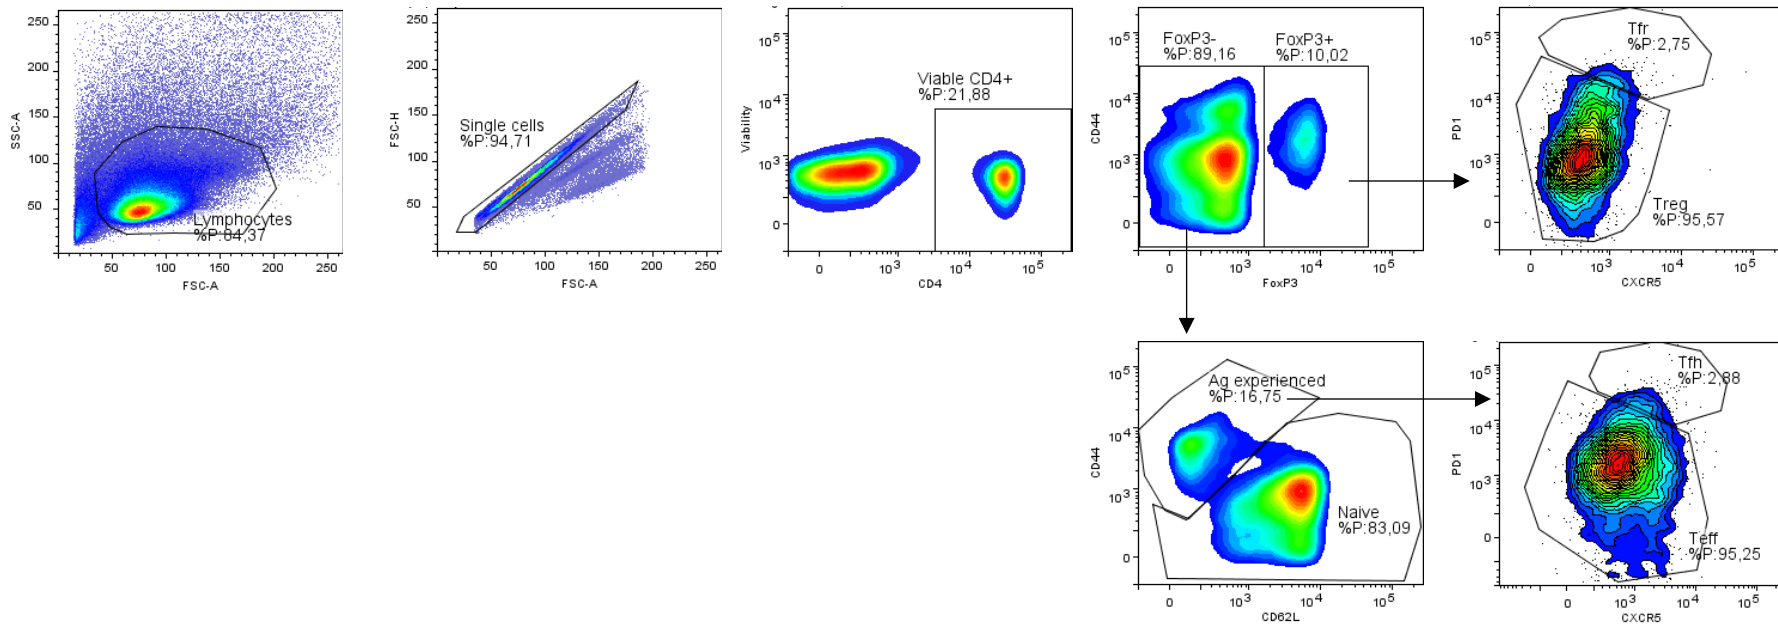

Figure S2: Top 10 differentially expressed genes in clusters.

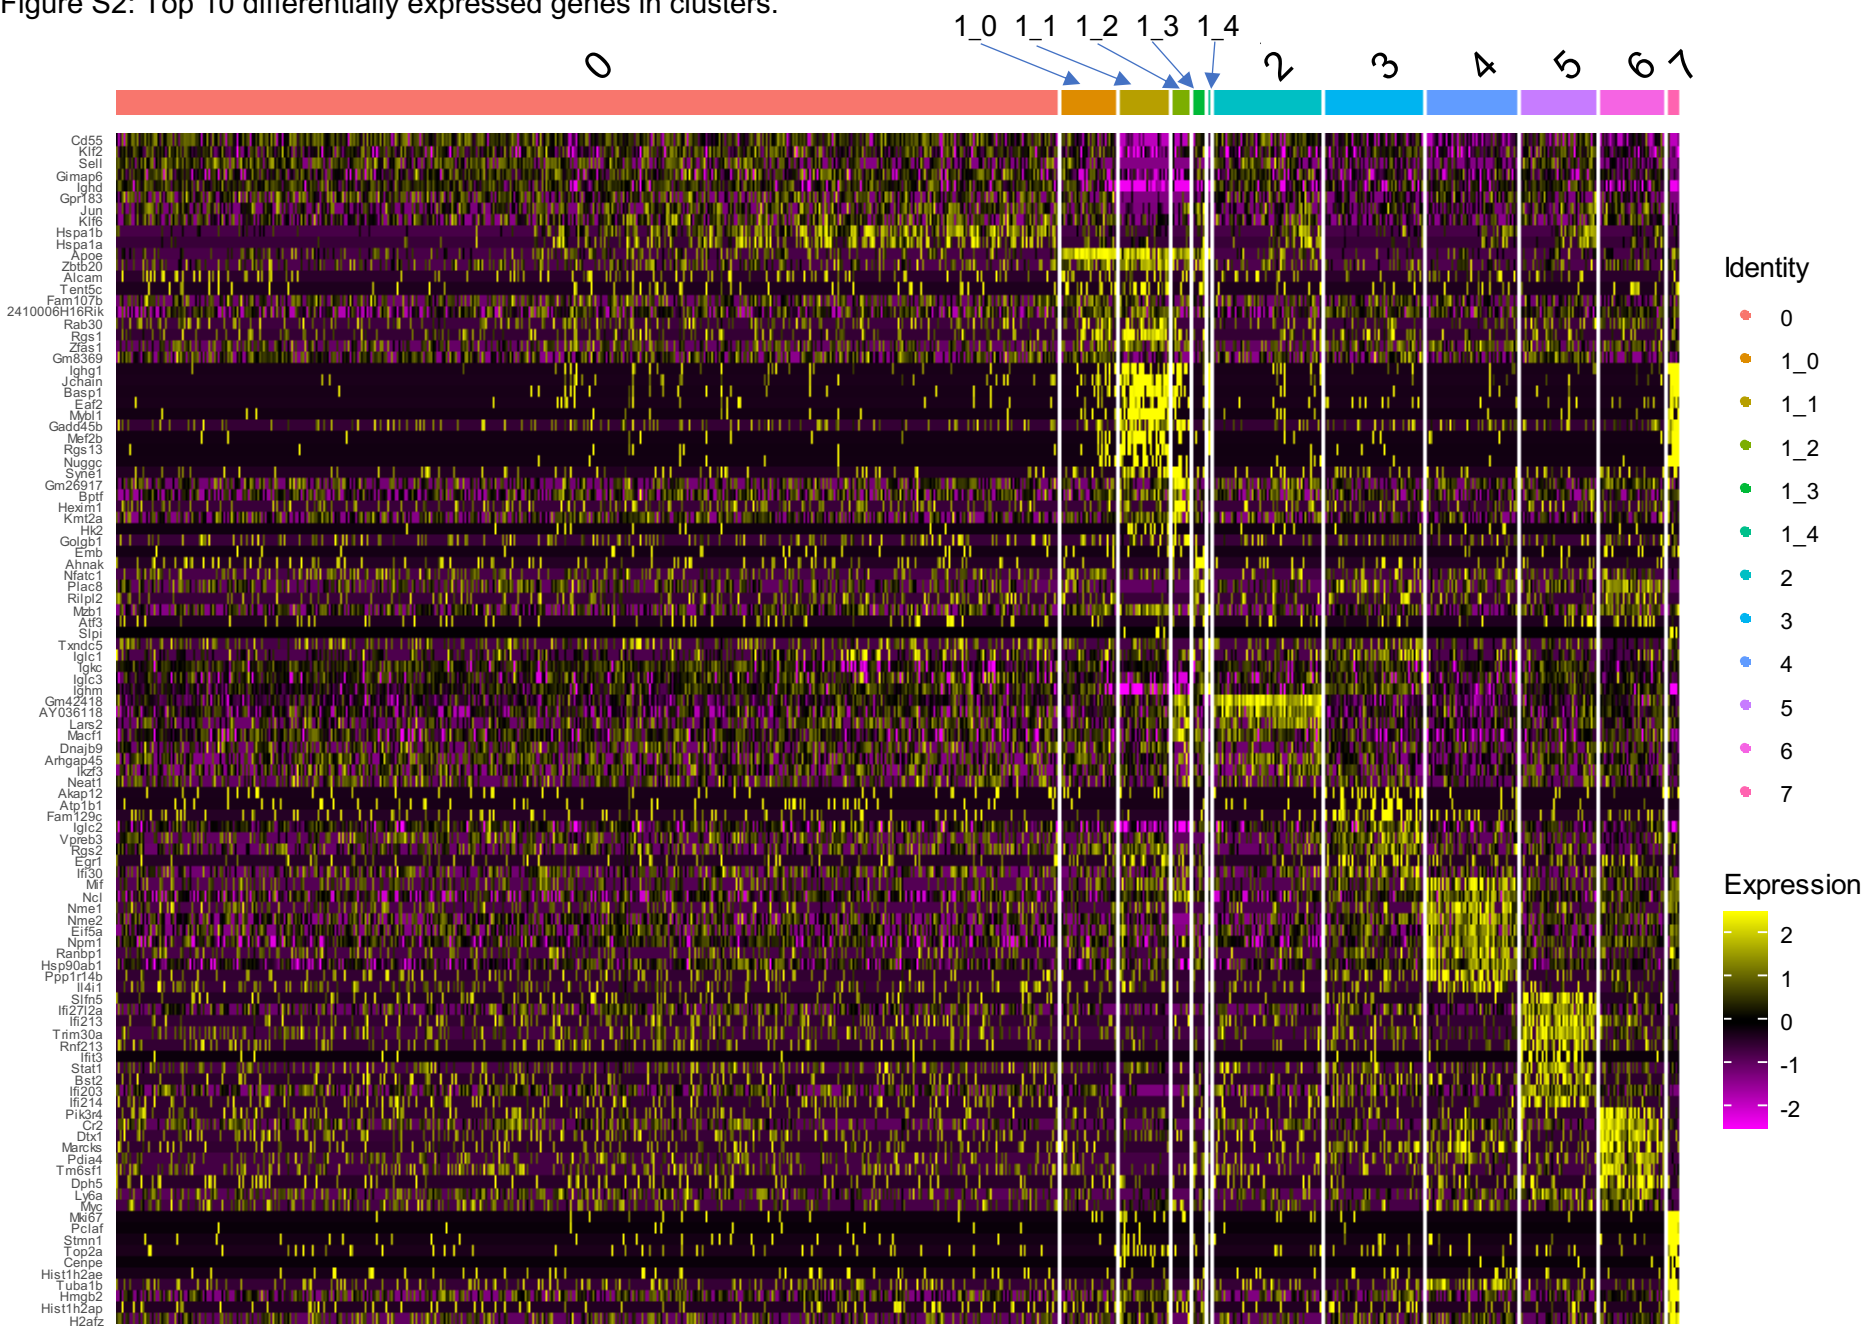

Supplement: s1 [file s1]
